# Supplementary material for: Resiquimod-encapsulated MOF525 for Sustained Immunostimulant Release and Synergistic Photodynamic– Immunotherapy in Colorectal Cancer
Source: Research Square preprint supplement (doi:10.21203/rs.3.rs-8452162/v1), 2026-01-14

Supporting Information

Resiquimod-encapsulated MOF525 for Sustained Immunostimulant Release and Synergistic Photodynamic–Immunotherapy in Colorectal Cancer

Na Kyeong Lee, Nea Young Chun, Yu Jin Oh, Ulziituya Batjargal, Min-Seok Kim, WonJun Jang, Tae-Eun Park, Han-Jun Kim, Wooram Park*, Chun Gwon Park*, Se-Na Kim*


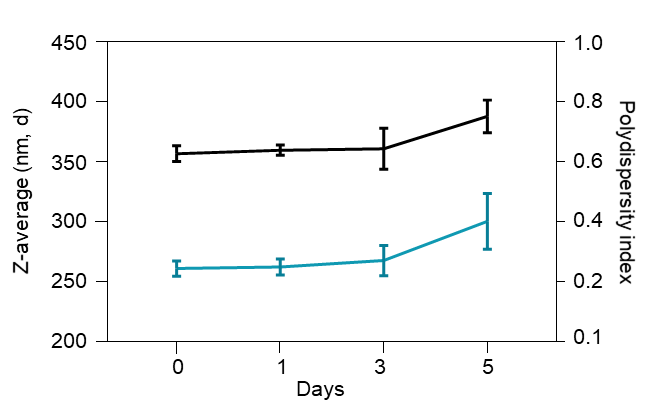


**Figure S1.** Hydrodynamic stability of MOF525 in serum-containing conditions. The Z-average diameter and polydispersity index of MOF525 were measured by DLS to assess colloidal stability in PBS supplemented with 5% FBS. MOF525 maintained stable size distribution with minimal aggregation over the measured time points (n = 3).


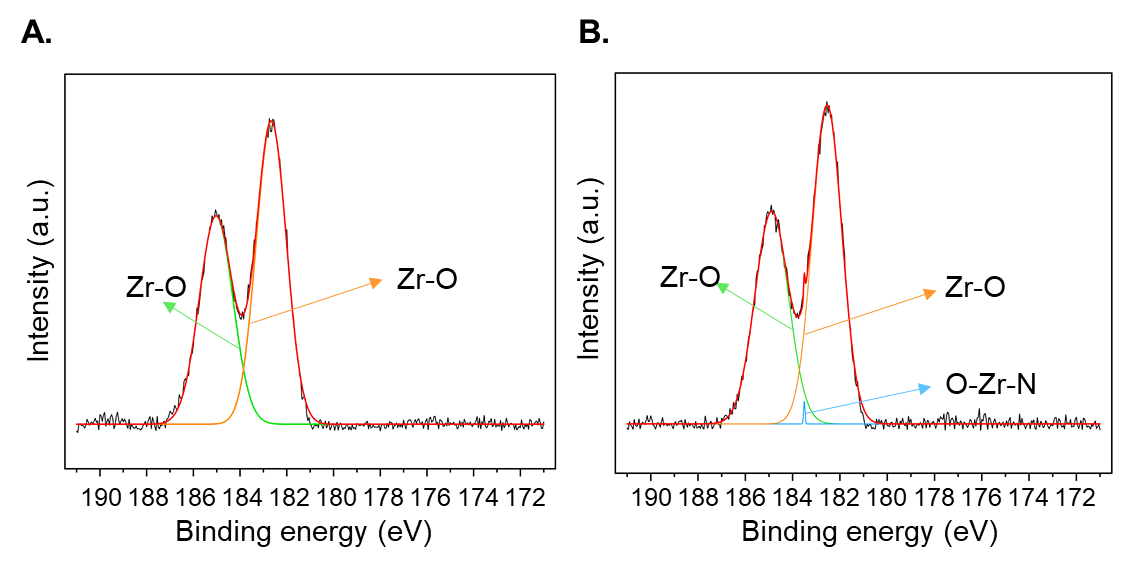


**Figure S2.** XPS spectra in the Zr 3d region of (A) MOF525 and (B) R848@MOF525. In the pristine MOF525, the Zr 3d spectrum shows a characteristic Zr–O bonding peak. After loading R848, R848@MOF525 displays an additional signal corresponding to O–Zr–N bonding, suggesting that the amine-containing functional group of R848 coordinates to the open metal sites of Zr in MOF525.

**Figure S3.** Quantification of ATP release as a DAMP signal following different treatment conditions. ATP levels were measured using a colorimetric ATP assay to evaluate extracellular ATP release. CT26 cells were assigned to four groups: non-treated control, laser irradiation only, MOF525 only, and MOF525 with laser irradiation. Combined treatment with MOF525 and laser irradiation induced the highest ATP release compared with other groups (n=5). ****P* < 0.001 compared to MOF525 treated group.


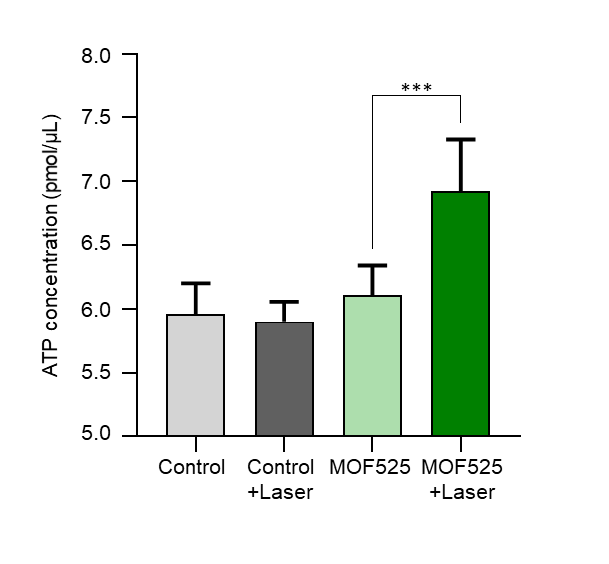

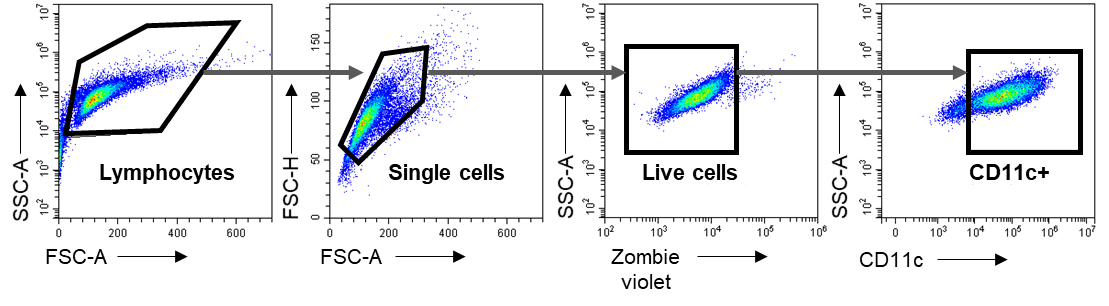


**Figure S4.** Gating strategy for BMDC.

Figure S5. CD86 expression in BMDCs at different MOF treatment concentrations *in vitro* (n=5). *****P* < 0.0001 compared to LPS treated group.


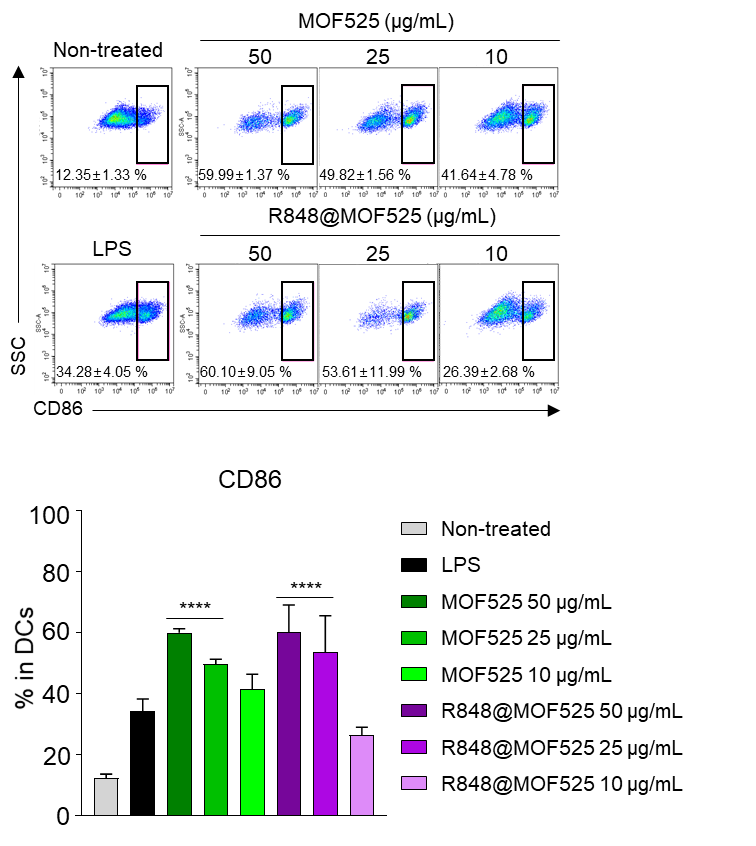


Figure S6. CD40 expression in BMDCs at different MOF treatment concentrations *in vitro* (n=5). *####P* < 0.0001 compared to non- treated group.


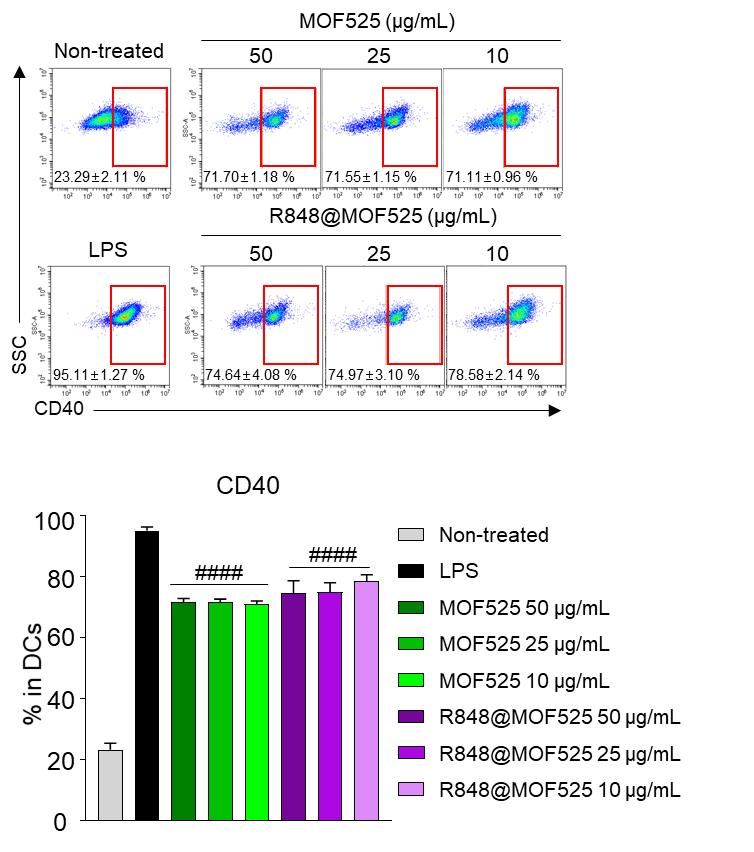


Figure S7. MHCII expression in BMDCs at different MOF treatment concentrations *in vitro* (n=5). *****P* < 0.0001 compared to the LPS-treated group.


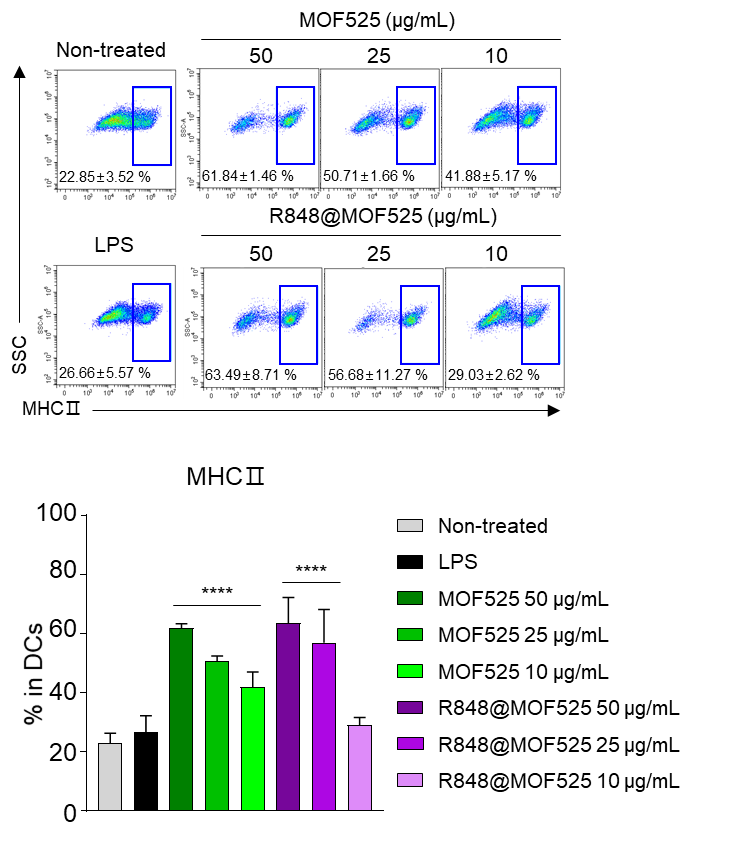


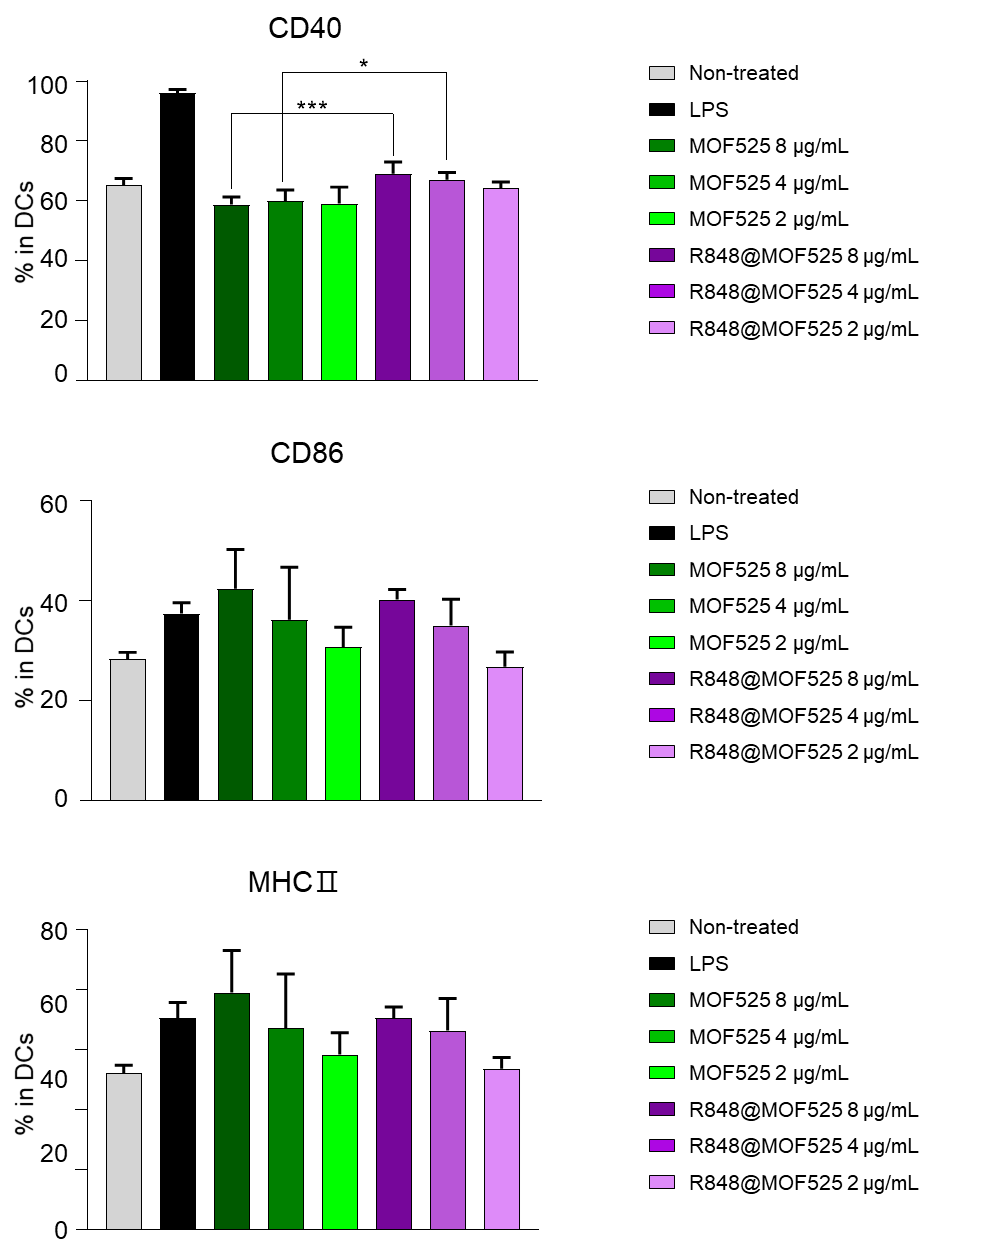


**Figure S8.** Expression of BMDCs maturation cell markers at treatment concentrations of below 10 µg/mL (n=5). ****P* < 0.001, **P* < 0.05.

Figure S9. Tumor rechallenge test evaluating long-term immune memory and protective effects of MOF. Representative image of a mouse 3 weeks after tumor rechallenge.


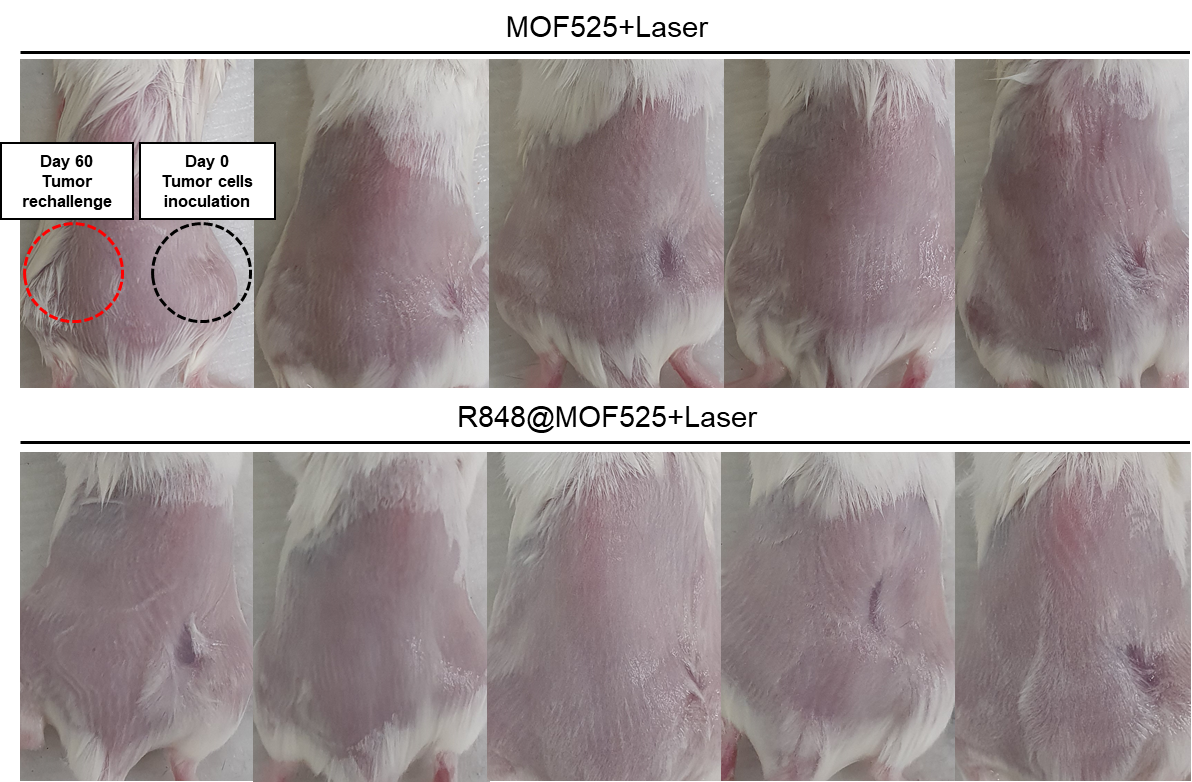


Figure S10. Histopathological assessment of vital organs following tumor rechallenge. Representative H&E stained sections of heart, lung, liver, kidney, and spleen (Scale bar=100 μm).


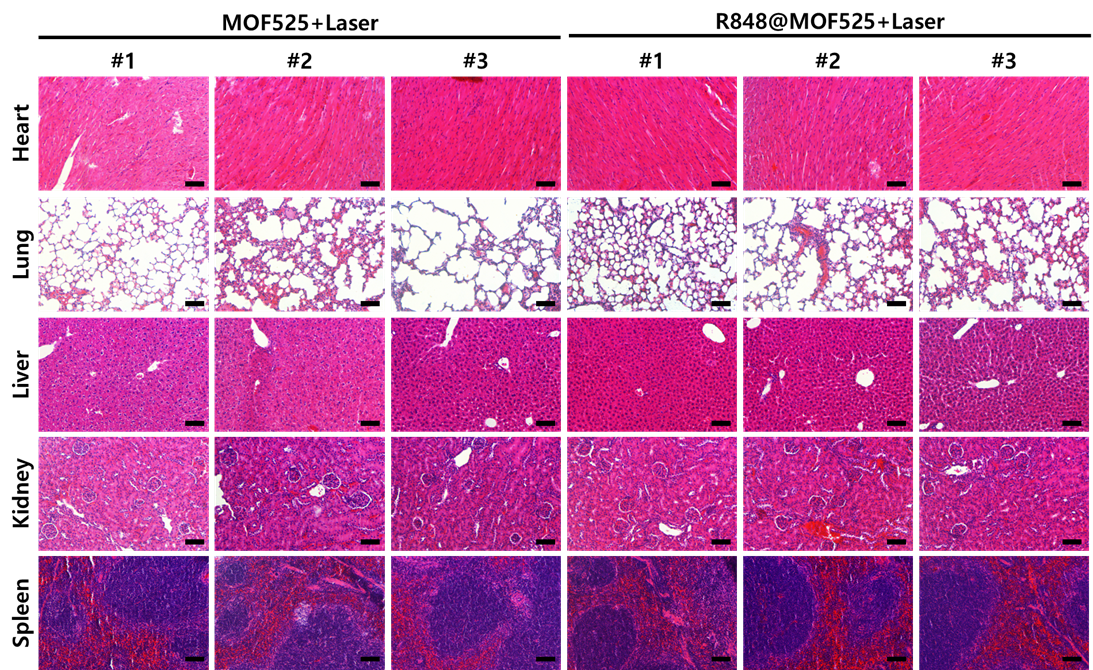


Figure S11. Body weight in the different groups of mouse (n=5). n.s, not significant.


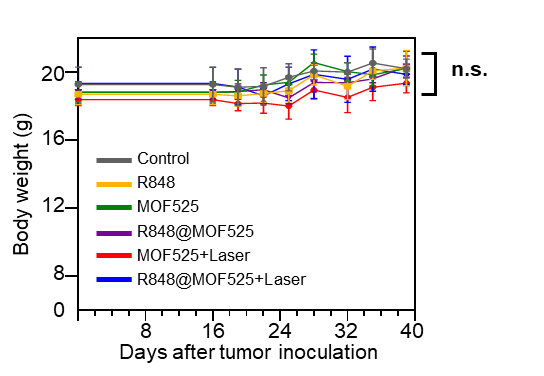

Supplement: Supplementary file 1 [file 5a40c83d0a1a2899a869cafb.docx]
